# Supplementary material for: Bone marrow sinusoidal endothelium controls terminal erythroid differentiation and reticulocyte maturation
Source: PubMed Central journal article supplement (PMC8630019; doi:10.1038/s41467-021-27161-3), 2021-11-29
Supplement: 41467_2021_27161_MOESM3_ESM.pdf [file 41467_2021_27161_MOESM3_ESM.pdf]

## Description of Additional Supplementary Files

### **Supplementary Data 1. Significantly differentially expressed genes (DEGs) in PIII of *Ctnnb1*<sup>OE-SEC</sup> mice compared to *Ctnnb1*<sup>WT</sup> controls.**

Genes displayed are those significantly up or down regulated in PIII of *Ctnnb1*<sup>OE-SEC</sup> compared to *Ctnnb1*<sup>WT</sup> controls (FC > |1|). Adjusted p-values were calculated for the differences of means of log2 of expressions values between PIII of *Ctnnb1*<sup>OE-SEC</sup> mice and *Ctnnb1*<sup>WT</sup>. OneWay-ANOVA was performed to identify DEGs.

### **Supplementary Data 2. Significantly differentially expressed genes (DEGs) in PIV of *Ctnnb1*<sup>OE-SEC</sup> mice compared to *Ctnnb1*<sup>WT</sup> controls.**

Genes displayed are those significantly up or down regulated in PIV of *Ctnnb1*<sup>OE-SEC</sup> compared to *Ctnnb1*<sup>WT</sup> controls (FC > |1|). Adjusted p-values were calculated for the differences of means of log2 of expressions values between PIV of *Ctnnb1*<sup>OE-SEC</sup> mice and *Ctnnb1*<sup>WT</sup>. OneWay-ANOVA was performed to identify DEGs.
